# Supplementary material for: The relationship between cumulative ecological risk and health risk behaviors among Chinese adolescents
Source: Springer Nature journal article supplement (doi:10.1186/s12889-024-17934-y), 2024-02-26
Supplement: MOESM1 [file 26784252]

Supplementary Table 1 Number, proportion and odds ratio of different HRBs by different cumulative ecological risk levels (classified at 33 percentile) in total samples

| Variables           | N (%)                          |                                 | Model 1 |           |         | Model 2 |           |         |
|---------------------|--------------------------------|---------------------------------|---------|-----------|---------|---------|-----------|---------|
|                     | Low cumulative ecological risk | High cumulative ecological risk | OR      | 95%CI     | P-value | OR      | 95%CI     | P-value |
| Breakfast           |                                |                                 |         |           |         |         |           |         |
| 7 days              | 5 667(70.1)                    | 7 834(53.0)                     | 1.00    |           |         | 1.00    |           |         |
| Eat, not daily      | 2 422(29.9)                    | 6 945(47.0)                     | 2.07    | 1.96-2.20 | <0.001  | 2.03    | 1.92-2.16 | <0.001  |
| Drinking            |                                |                                 |         |           |         |         |           |         |
| no                  | 7 567(93.5)                    | 12 578(85.1)                    | 1.00    |           |         | 1.00    |           |         |
| yes                 | 522(6.5)                       | 2 201(14.9)                     | 2.54    | 2.30-2.80 | <0.001  | 2.39    | 2.16-2.66 | <0.001  |
| Smoking             |                                |                                 |         |           |         |         |           |         |
| no                  | 7 968(98.5)                    | 14 116(95.5)                    | 1.00    |           |         | 1.00    |           |         |
| yes                 | 121(1.5)                       | 663(4.5)                        | 3.09    | 2.54-3.76 | <0.001  | 2.73    | 2.23-3.33 | <0.001  |
| Physical activity   |                                |                                 |         |           |         |         |           |         |
| sufficient          | 3 355(41.5)                    | 5 358(36.3)                     | 1.00    |           |         | 1.00    |           |         |
| insufficient        | 4 734(58.5)                    | 9 427(63.7)                     | 1.25    | 1.18~1.32 | <0.001  | 1.22    | 1.15-1.29 | <0.001  |
| High ST in weekdays |                                |                                 |         |           |         |         |           |         |
| no                  | 7 303(90.3)                    | 12 106(81.9)                    | 1.00    |           |         | 1.00    |           |         |
| yes                 | 786(9.7)                       | 2673(18.1)                      | 2.05    | 1.89~2.23 | <0.001  | 2.11    | 1.93-2.30 | <0.001  |
| High ST in weekends |                                |                                 |         |           |         |         |           |         |
| no                  | 5 062(62.6)                    | 6 112(41.4)                     | 1.00    |           |         | 1.00    |           |         |
| yes                 | 3 027(37.4)                    | 8 667(58.6)                     | 2.37    | 2.24~2.51 | <0.001  | 2.04    | 1.93-2.16 | <0.001  |
| Suicidal ideation   |                                |                                 |         |           |         |         |           |         |
| no                  | 7 012(86.7)                    | 9 525(64.4)                     | 1.00    |           |         | 1.00    |           |         |
| yes                 | 1 077(13.3)                    | 5 254(35.6)                     | 3.59    | 3.34~3.86 | <0.001  | 3.91    | 3.63-4.22 | <0.001  |
| Suicidal plan       |                                |                                 |         |           |         |         |           |         |
| no                  | 7 615(94.1)                    | 12 070(81.7)                    | 1.00    |           |         | 1.00    |           |         |
| yes                 | 474(5.9)                       | 2 709(18.3)                     | 3.61    | 3.26~3.99 | <0.001  | 4.04    | 3.64-4.49 | <0.001  |
| Suicidal attempt    |                                |                                 |         |           |         |         |           |         |
| no                  | 7 875(97.4)                    | 13 499(91.3)                    | 1.00    |           |         | 1.00    |           |         |
| yes                 | 214(2.6)                       | 1 280(8.7)                      | 3.49    | 3.01~4.04 | <0.001  | 3.99    | 3.43-4.64 | <0.001  |
| NNSI                |                                |                                 |         |           |         |         |           |         |
| no                  | 6 890(85.2)                    | 9 798(66.3)                     | 1.00    |           |         | 1.00    |           |         |
| yes                 | 1 199(14.8)                    | 4 981(33.7)                     | 2.92    | 2.72~3.13 | <0.001  | 3.26    | 3.03-3.50 | <0.001  |

OR, odds ratio; CI, confidence interval; HRBs, health risk behaviors; AU, alcohol use; ST, screen time; NNSI, non-suicidal self-injury;

Model 1 unadjusted model;

Model 2 adjusted for age, gender, grade, registered residence, educational levels of parents, self-reported family economy and regional economic level.

Supplementary Table 2 Number, proportion and odds ratio of different HRBs by different cumulative ecological risk levels (classified at 33 percentile) in different genders, and the gender ratio

| Variables                       | Boys         |                         |                         | Girls        |                         |                         | Ratio of two odds ratios in boys versus girls <sup>b</sup> |                  |
|---------------------------------|--------------|-------------------------|-------------------------|--------------|-------------------------|-------------------------|------------------------------------------------------------|------------------|
|                                 | n (%)        | OR (95%CI) <sup>a</sup> | OR (95%CI) <sup>b</sup> | n (%)        | OR (95%CI) <sup>a</sup> | OR (95%CI) <sup>b</sup> | ROR                                                        | one-side P-value |
| <b>Breakfast</b>                |              |                         |                         |              |                         |                         |                                                            |                  |
| 7 days                          | 7 156(61.8)  | 1.00                    |                         | 6 345(56.2)  | 1.00                    |                         |                                                            |                  |
| Eat, not daily                  | 4 422(38.2)  | 2.02(1.86-2.19) **      | 1.96(1.80-2.13) **      | 4 945(43.8)  | 2.13(1.97-2.31) **      | 2.11(1.94-2.30) **      | 0.93                                                       | 0.100            |
| <b>Drinking</b>                 |              |                         |                         |              |                         |                         |                                                            |                  |
| no                              | 9 777(84.4)  | 1.00                    |                         | 10 368(91.8) | 1.00                    |                         |                                                            |                  |
| yes                             | 1 801(15.6)  | 2.25(1.99-2.53) **      | 1.93(1.71-2.18) **      | 922(8.2)     | 3.51(2.91-4.25) **      | 3.72(3.07-4.51) **      | 0.52                                                       | <0.001           |
| <b>Smoking</b>                  |              |                         |                         |              |                         |                         |                                                            |                  |
| no                              | 10 968(94.7) | 1.00                    |                         | 11 116(98.5) | 1.00                    |                         |                                                            |                  |
| yes                             | 610(5.3)     | 2.71(2.19-3.34) **      | 2.21(1.78-2.75) **      | 174(1.5)     | 6.78(3.85-11.94) **     | 7.00(3.95-12.40) **     | 0.32                                                       | <0.001           |
| <b>Physical activity</b>        |              |                         |                         |              |                         |                         |                                                            |                  |
| sufficient                      | 4 744(41.0)  | 1.00                    |                         | 3 969(35.2)  | 1.00                    |                         |                                                            |                  |
| insufficient                    | 6 834(59.0)  | 1.30(1.20-1.41) **      | 1.27(1.17-1.38) **      | 7 321(64.8)  | 1.19(1.09-1.29) **      | 1.17(1.07-1.27) **      | 1.09                                                       | 0.074            |
| <b>High ST in weekdays</b>      |              |                         |                         |              |                         |                         |                                                            |                  |
| no                              | 9 678(83.6)  | 1.00                    |                         | 9 731(86.2)  | 1.00                    |                         |                                                            |                  |
| yes                             | 1 900(16.4)  | 1.94(1.73-2.17) **      | 1.95(1.74-2.19) **      | 1 559(13.8)  | 2.22(1.95-2.53) **      | 2.33(2.04-2.65) **      | 0.84                                                       | 0.026            |
| <b>High ST in weekends</b>      |              |                         |                         |              |                         |                         |                                                            |                  |
| no                              | 5 606(48.4)  | 1.00                    |                         | 5568(49.3)   | 1.00                    |                         |                                                            |                  |
| yes                             | 5 972(51.6)  | 2.25(2.08-2.43) **      | 1.93(1.78-2.10) **      | 5 722(50.7)  | 2.51(2.32-2.72) **      | 2.16(1.99-2.35) **      | 0.89                                                       | 0.028            |
| <b>Suicidal ideation</b>        |              |                         |                         |              |                         |                         |                                                            |                  |
| no                              | 9 036(78.0)  | 1.00                    |                         | 7 501(66.4)  | 1.00                    |                         |                                                            |                  |
| yes                             | 2 542(22.0)  | 3.38(3.03-3.78) **      | 3.47(3.09-3.89) **      | 3 789(33.6)  | 3.85(3.49-4.24) **      | 4.28(3.87-4.73) **      | 0.81                                                       | <0.003           |
| <b>Suicidal plan</b>            |              |                         |                         |              |                         |                         |                                                            |                  |
| no                              | 10 366(89.5) | 1.00                    |                         | 9 319(82.5)  | 1.00                    |                         |                                                            |                  |
| yes                             | 1 212(10.5)  | 3.27(2.79-3.84) **      | 3.46(2.94-4.07) **      | 1 971(17.5)  | 3.88(3.40-4.43) **      | 4.49(3.91-5.14) **      | 0.77                                                       | 0.008            |
| <b>Suicidal attempt</b>         |              |                         |                         |              |                         |                         |                                                            |                  |
| no                              | 11 089(95.8) | 1.00                    |                         | 10 285(91.1) | 1.00                    |                         |                                                            |                  |
| yes                             | 489(4.2)     | 3.05(2.39-3.90) **      | 3.15(2.45-4.05) **      | 1 005(8.9)   | 3.76(3.12-4.52) **      | 4.51(3.73-5.45) **      | 0.70                                                       | 0.013            |
| <b>Non-suicidal self-injury</b> |              |                         |                         |              |                         |                         |                                                            |                  |
| no                              | 8 806(76.1)  | 1.00                    |                         | 7 882(69.8)  | 1.00                    |                         |                                                            |                  |
| yes                             | 2 772(23.9)  | 2.69(2.43-2.98) **      | 2.82(2.53-3.13) **      | 3 408(30.2)  | 3.15(2.86-3.48) **      | 3.72(3.36-4.12) **      | 0.76                                                       | <0.001           |

OR, odds ratio; CI, confidence interval; HRBs, health risk behaviors; AU, alcohol use; ST, screen time; NSSI, non-suicidal self-injury; \*\*  $p < 0.001$

<sup>a</sup> Unadjusted model;

<sup>b</sup> Adjusted for age, gender, grade, registered residence, educational levels of parents, self-reported family economy and regional economic level.

Supplementary Table 3 Odds ratio of different groups HRBs by different cumulative ecological risks levels  
(classified at 33 percentile) in different genders, and the gender ratio

| Model   | Variables                | Low-risk behavior class | High-risk behavior class |
|---------|--------------------------|-------------------------|--------------------------|
| Model 1 |                          |                         |                          |
| Total   | OR (95%CI)               | 1.00                    | 4.33(3.98-4.71)          |
|         | <i>P</i> -value          |                         | <0.01                    |
| Boys    | OR (95%CI)               | 1.00                    | 3.82(3.36-4.34)          |
|         | <i>P</i> -value          |                         | <0.01                    |
| Girls   | OR (95%CI)               | 1.00                    | 4.83(4.32-5.42)          |
|         | <i>P</i> -value          |                         | <0.01                    |
|         | Ratio of two odds ratios | ROR                     | 0.79                     |
|         | in boys versus girls     | one-side                | <b>0.003</b>             |
|         |                          | <i>P</i> -value         |                          |
| Model 2 |                          |                         |                          |
| Total   | OR (95%CI)               | 1.00                    | 4.59(4.20-5.01)          |
|         | <i>P</i> -value          |                         | <0.01                    |
| Boys    | OR (95%CI)               | 1.00                    | 3.83(3.36-4.37)          |
|         | <i>P</i> -value          |                         | <0.01                    |
| Girls   | OR (95%CI)               | 1.00                    | 5.25(4.67-5.90)          |
|         | <i>P</i> -value          |                         | <0.01                    |
|         | Ratio of two odds ratios | ROR                     | 0.73                     |
|         | in boys versus girls     | one-side                | <b>&lt;0.001</b>         |
|         |                          | <i>P</i> -value         |                          |

OR, odds ratio; CI, confidence; ROR, ratio of two odds ratios;

Model 1 unadjusted model;

Model 2 adjusted for age, grade, registered residence, educational levels of parents, self-reported family economy and regional economic level.
